# Supplementary material for: Digitonin-facilitated delivery of imaging probes enables single-cell analysis of AKT signalling activities in suspension cells
Source: Royal Society of Chemistry journal article supplement (doi:10.1039/d1an00751c), 2021-01-01
Supplement: d1an00751c1.pdf [file d1an00751c1.pdf]

## Supplementary Information

### **Digitonin-facilitated delivery of imaging probes enables single-cell analysis of AKT signalling activities in suspension cells**

Siwen Wang,<sup>a</sup> Nicole G. Perkins,<sup>a</sup> Fei Ji,<sup>a</sup> Rohit Chaudhuri,<sup>a</sup> Zhili Guo,<sup>a</sup> Priyanka Sarkar,<sup>a</sup>

Shiqun Shao,<sup>a</sup> Zhonghan Li,<sup>a</sup> and Min Xue,<sup>a,\*</sup>

<sup>a</sup>Department of Chemistry, University of California, Riverside

Riverside, California 92521, United States

Corresponding Author: Min Xue

E-mail: [minxue@ucr.edu](mailto:minxue@ucr.edu)

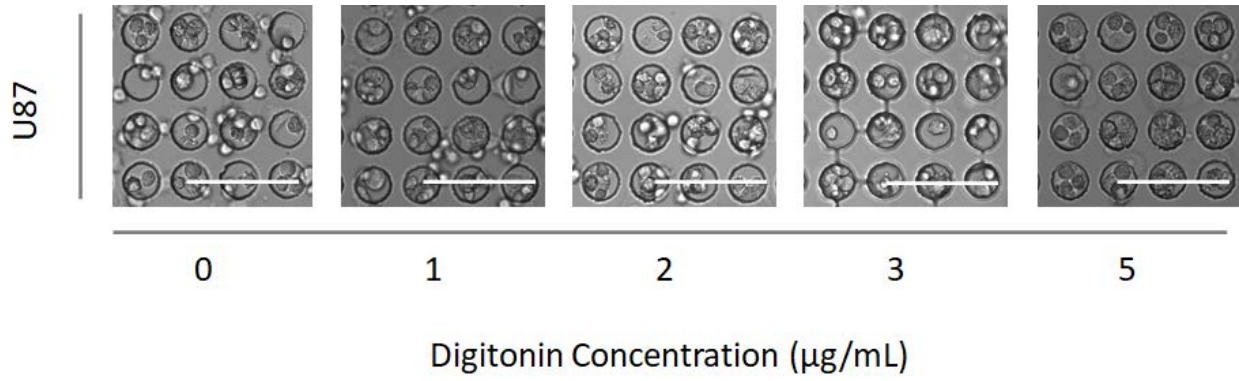

**Fig. S1.** Zoom-in images of the U87 cells treated with digitonin. Scale bar: 100  $\mu\text{m}$ .

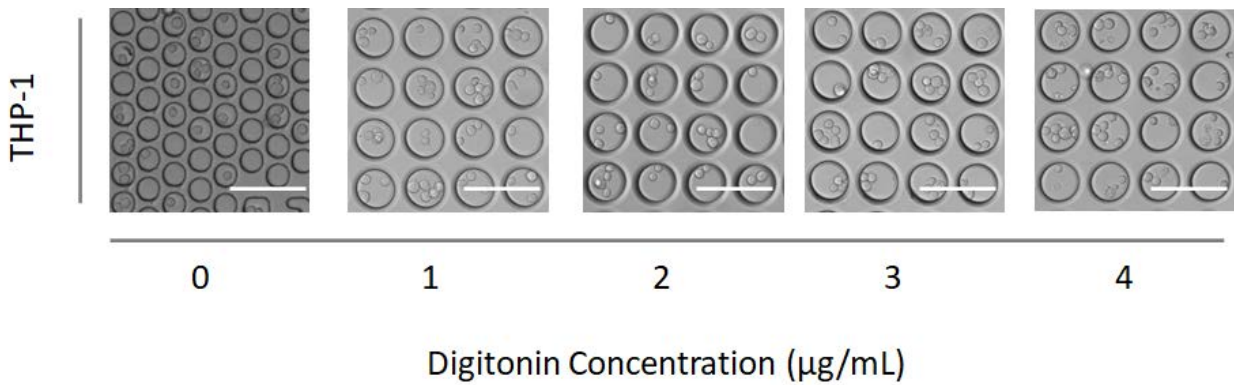

**Fig. S2.** Zoom-in images of the THP-1 cells treated with digitonin. Scale bar: 100  $\mu\text{m}$ . Different sized microwells were used in the experiment.

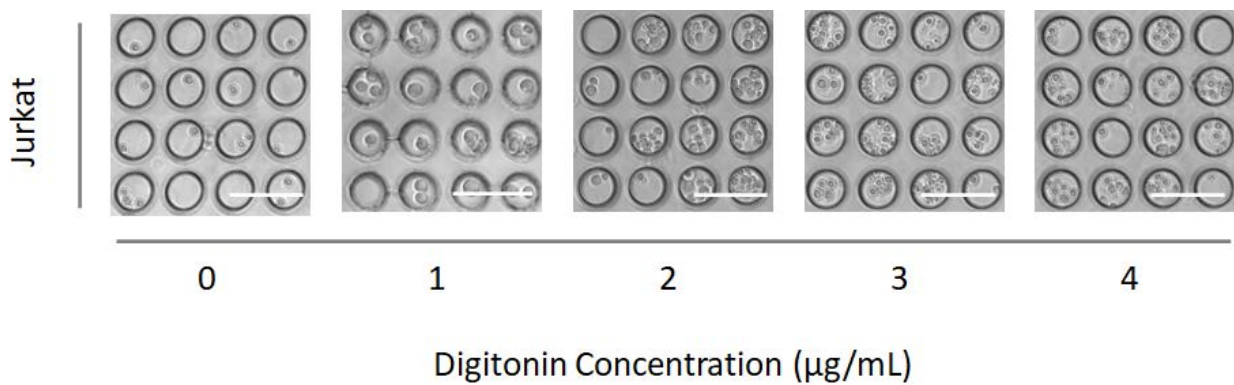

**Fig. S3.** Zoom-in images of the Jurkat cells treated with digitonin. Scale bar: 100  $\mu\text{m}$ . Different sized microwells were used in the experiment.

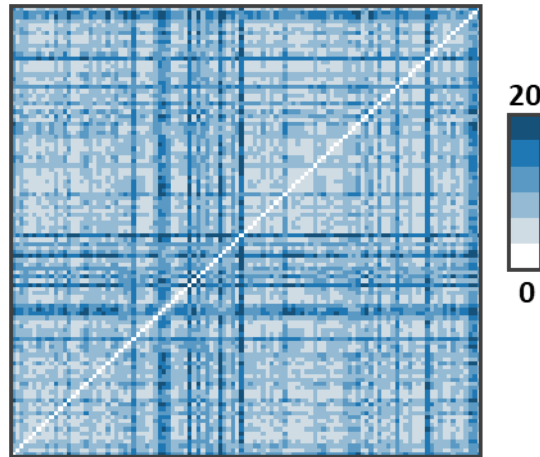

**Fig. S4.** The distance matrix generated from the DTW analysis on the THP-1 data set. Each pixel represents the dissimilarity between two corresponding single cells (column and row).

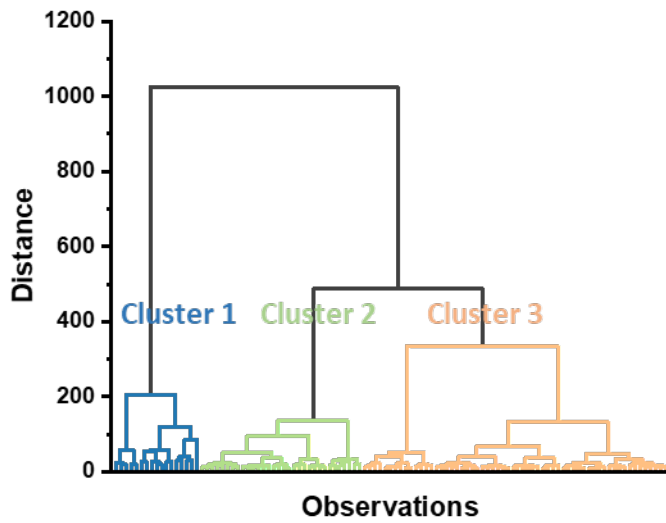

**Fig. S5.** Agglomerative hierarchical clustering results of the distance matrix (THP-1 cells).

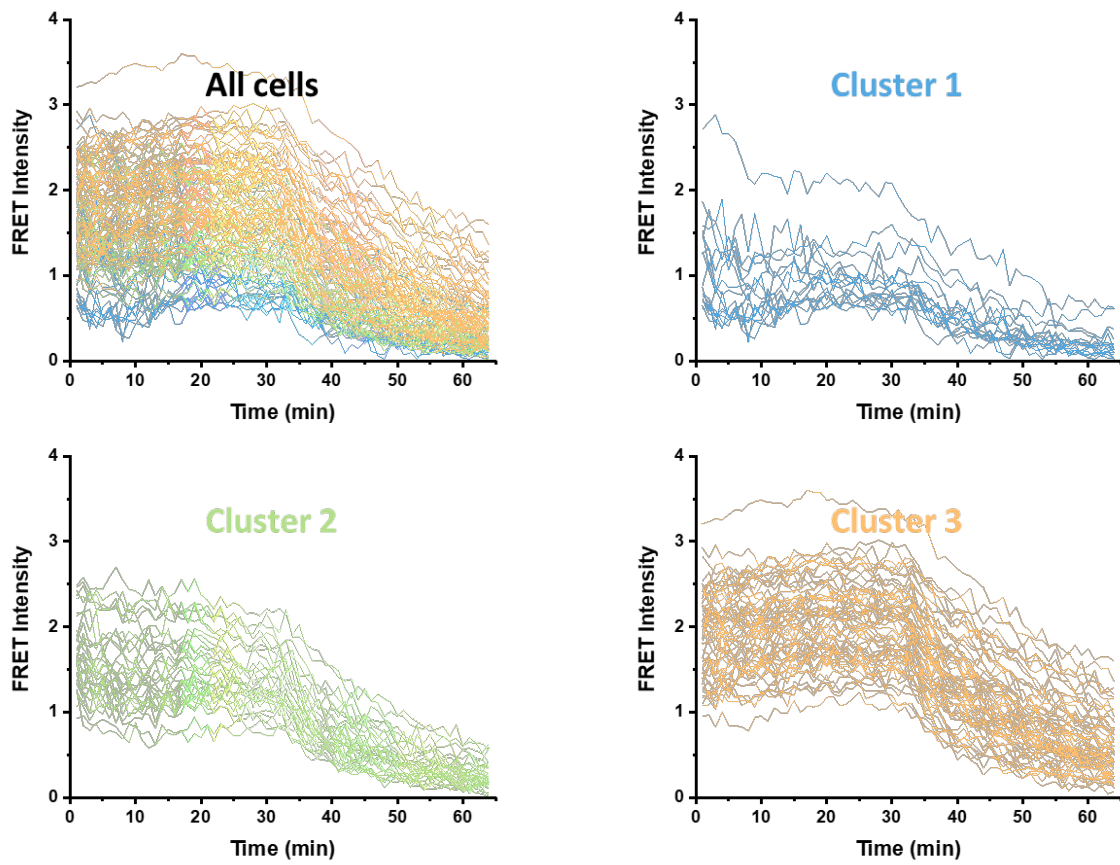

**Fig. S6.** Single-cell AKT signaling trajectories. The clusters are colorcoded (THP-1 cells).

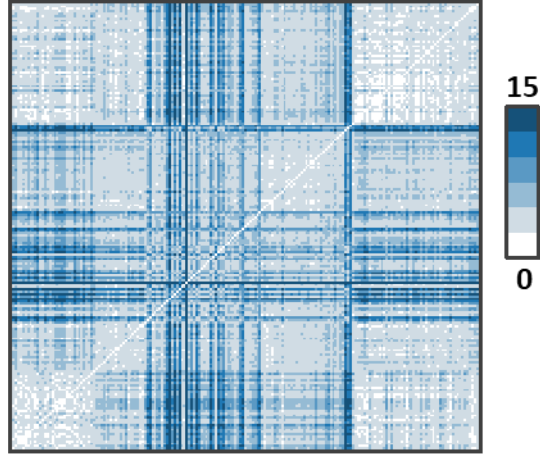

**Fig. S7.** The distance matrix generated from the DTW analysis on the Jurkat data set. Each pixel represents the dissimilarity between two corresponding single cells (column and row).

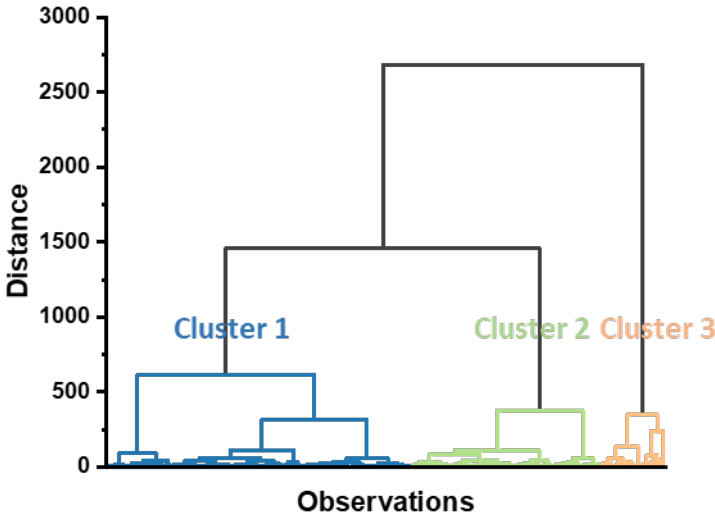

**Fig. S8.** Agglomerative hierarchical clustering results of the distance matrix (Jurkat cells).

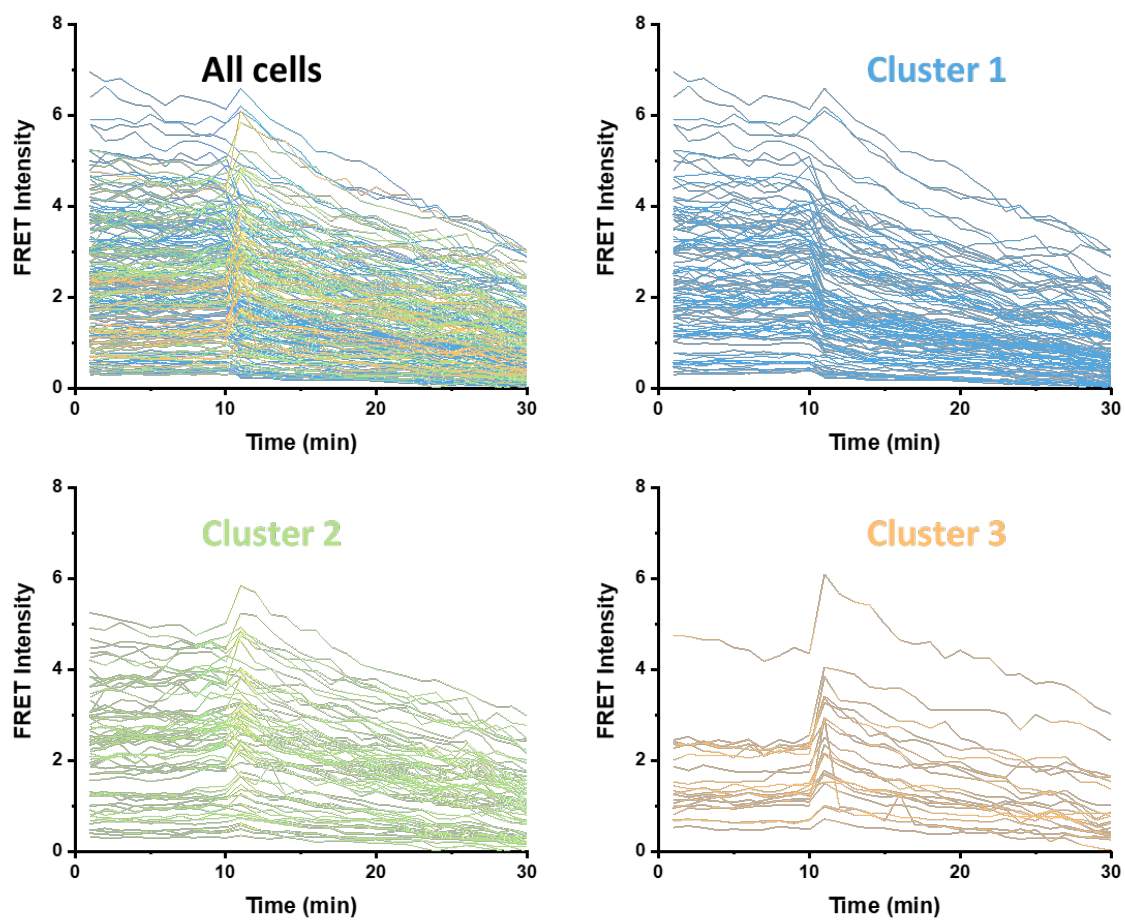

Fig. S9. Single-cell AKT signaling trajectories. The clusters are colorcoded (Jurkat cells).
